# Supplementary material for: Screening of Monoamine Oxidase Inhibitors from Seeds of Nigella glandulifera Freyn et Sint. by Ligand Fishing and Their Neuroprotective Activity
Source: MDPI journal article supplement (doi:10.3390/plants12040882), 2023-02-15
Supplement: s1 [file s1]

## SUPPLEMENTARY MATERIALS

## Screening of Monoamine Oxidase Inhibitors from Seeds of *Nigella glandulifera* Freyn et Sint. by Ligand Fishing and Their Neuroprotective Activity

Emmanuel Ayodeji Ayeni <sup>1,2</sup>, Chao Ma <sup>3</sup>, Yi-Kao Hu <sup>1,2</sup>, Xiao-Lin Bai <sup>1,2</sup>, Yong-Mei Zhang <sup>1,\*</sup> and Xun Liao <sup>1,\*</sup>

<sup>1</sup> Chengdu Institute of Biology, Chinese Academy of Sciences, Chengdu 610041, China

<sup>2</sup> University of Chinese Academy of Sciences, Beijing 100049, China

<sup>3</sup> Phytochemistry Laboratory, Tibet Plateau Institute of Biology, Lhasa 850001, China

\* Correspondence: zhangym@cib.ac.cn (Y.-M.Z.); liaoxun@cib.ac.cn (X.L.); Tel.: +028-82890756 (Y.-M.Z.); Tel.: +86-18010696109 (X.L.)

**Abstract:** *Nigella glandulifera* is a traditional medicinal plant used to treat seizures, insomnia, and mental disorders among the Tibetan and Xinjiang people of China. Recent pharmacological research indicates that the seeds of this plant have a neuroprotective effect; however, the chemical components responsible for this effect are unknown. Monoamine oxidase B (MAO-B) has been recognized as a target for developing anti-Parkinson's disease drugs. In this work, MAO-B functionalized magnetic nanoparticles were used to enrich the enzyme's ligands in extracts of *N. glandulifera* seeds for rapid screening of MAO-B inhibitors coupled with HPLC-MS. Tauroside E and thymoquinone were found to inhibit the enzyme with IC<sub>50</sub> values of 35.85  $\mu$ M and 25.54  $\mu$ M, respectively. Both compounds exhibited neuroprotective effects on 6-OHDA-induced PC-12 cells by increasing the cell viability to 52% and 58%, respectively, compared to 50% of the injured cells. Finally, molecular docking indicated strong interactions of both inhibitors with the enzyme. This work shows that MAO-B functionalized magnetic nanoparticles are effective for rapid screening of anti-PD inhibitors from complex herbal mixtures and, at the same time, shows the promising potential of this plant's seeds in developing anti-PD drugs.

Table S1. ESI-MS of MAO-B ligands isolated.

Figure S1. ESI-MS of compounds **1**.

Figure S2. ESI-MS of compounds **2**.

Figure S3. Chromatogram of the S5 and the isolated compounds **1** and **2**

Table S1. ESI-MS of MAO-B ligands isolated

| Compound | Pseudo<br>molecular peak | Mass<br>( <i>m/z</i> ) | Error<br>(ppm) | Calculated<br>mass | Molecular<br>formular                           | Compound<br>identified |
|----------|--------------------------|------------------------|----------------|--------------------|-------------------------------------------------|------------------------|
| <b>1</b> | [M+Na] <sup>+</sup>      | 773.44                 | 3.6            | 750.44             | C <sub>41</sub> H <sub>66</sub> O <sub>12</sub> | Tauroside E            |
| <b>2</b> | [M+H] <sup>+</sup>       | 167.08                 | -20.2          | 166.08             | C <sub>10</sub> H <sub>12</sub> O <sub>2</sub>  | Thymoquinone           |

## Mass Spectrum SmartFormula Report

### Analysis Info

Analysis Name D:\data\USER-2022\NG-1.d  
 Method tune\_low\_NEW.m  
 Sample Name NG-1  
 Comment

Acquisition Date 6/2/2022 3:13:52 PM

Operator Ma  
 Instrument / Ser# microTOF-Q II 10203

### Acquisition Parameter

|             |            |                       |           |                  |           |
|-------------|------------|-----------------------|-----------|------------------|-----------|
| Source Type | ESI        | Ion Polarity          | Positive  | Set Nebulizer    | 0.8 Bar   |
| Focus       | Not active | Set Capillary         | 4500 V    | Set Dry Heater   | 180 °C    |
| Scan Begin  | 50 m/z     | Set End Plate Offset  | -500 V    | Set Dry Gas      | 6.0 l/min |
| Scan End    | 1200 m/z   | Set Collision Cell RF | 150.0 Vpp | Set Divert Valve | Source    |

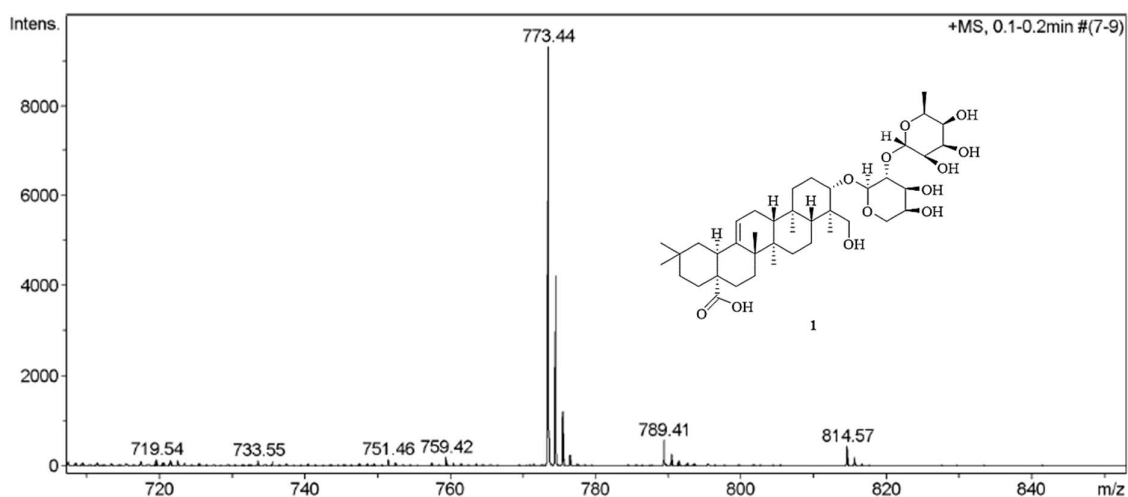

| Meas. m/z | Formula                                           | m/z    | err [ppm] | mSigma | N-Rule | e <sup>-</sup> Conf |
|-----------|---------------------------------------------------|--------|-----------|--------|--------|---------------------|
| 773.44    | C <sub>41</sub> H <sub>66</sub> NaO <sub>12</sub> | 773.44 | 3.6       | 2.23   | ok     | even                |

Figure S1. ESI-MS of compound 1

## Mass Spectrum SmartFormula Report

### Analysis Info

Analysis Name D:\data\USER-2022\NG-2.d  
 Method tune\_low\_NEW.m  
 Sample Name NG-2  
 Comment

Acquisition Date 6/2/2022 3:15:08 PM

Operator Ma  
 Instrument / Ser# micrOTOF-Q II 10203

### Acquisition Parameter

|             |            |                       |           |                  |           |
|-------------|------------|-----------------------|-----------|------------------|-----------|
| Source Type | ESI        | Ion Polarity          | Positive  | Set Nebulizer    | 0.8 Bar   |
| Focus       | Not active | Set Capillary         | 4500 V    | Set Dry Heater   | 180 °C    |
| Scan Begin  | 50 m/z     | Set End Plate Offset  | -500 V    | Set Dry Gas      | 6.0 l/min |
| Scan End    | 1200 m/z   | Set Collision Cell RF | 150.0 Vpp | Set Divert Valve | Source    |

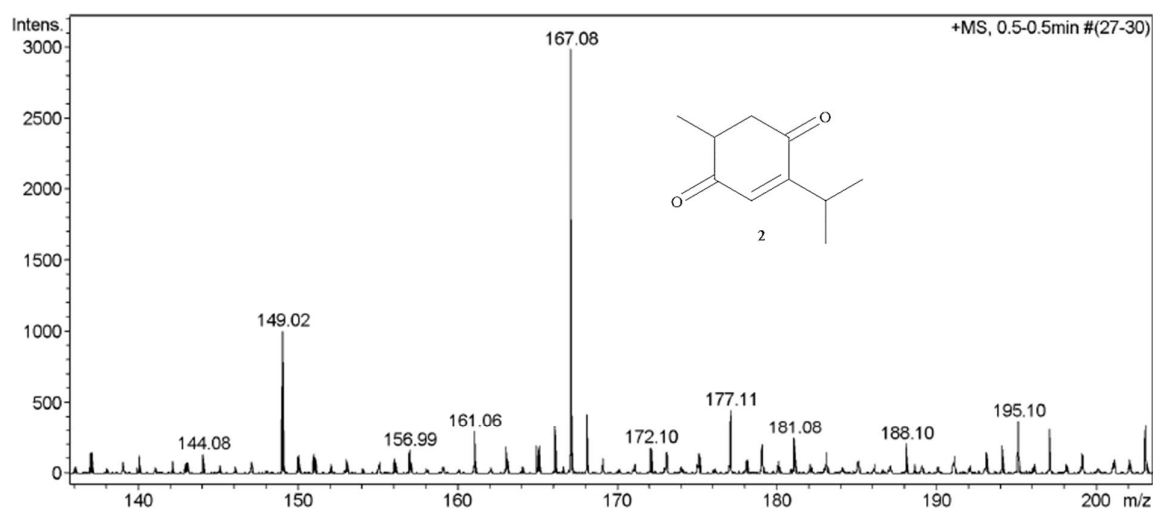

| Meas. m/z | Formula          | m/z    | err [ppm] | mSigma | N-Rule | e <sup>-</sup> Conf |
|-----------|------------------|--------|-----------|--------|--------|---------------------|
| 167.08    |                  |        |           |        |        |                     |
|           | C 13 H 11        | 167.09 | 3.9       | 14.91  | ok     | even                |
|           | C 8 H 11 N 2 O 2 | 167.08 | -20.2     | 31.26  | ok     | even                |

Figure S2. ESI-MS of compound 2

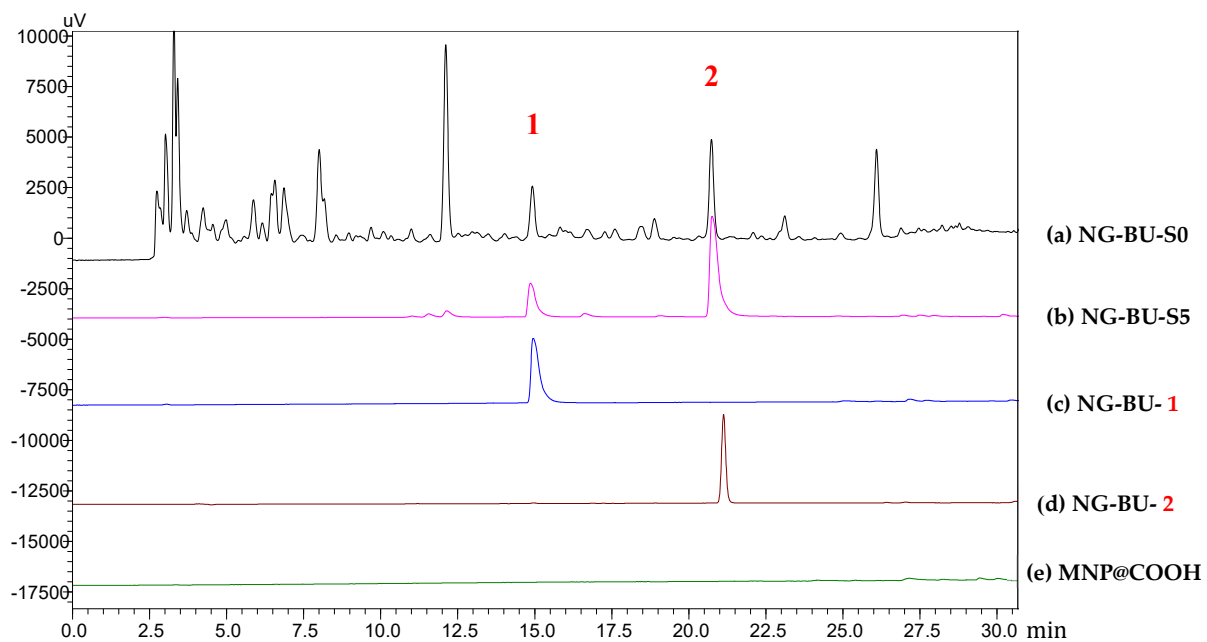

Figure S3. Chromatogram of the S5 and the isolated compound **1** and **2**
